# Supplementary material for: TPPS4—Sensitized Photooxidation of Micropollutants—Singlet Molecular Oxygen Kinetic Study
Source: MDPI journal article supplement (doi:10.3390/molecules27165260), 2022-08-17
Supplement: s1 [file s1]

## Supplementary Information

# TPPS<sub>4</sub>—Sensitized Photooxidation of Micropollutants—Singlet Molecular Oxygen Kinetic Study

Marta Gmurek

Molecular Engineering Department, Lodz University of Technology, Wolczanska 213, 90-924 Lodz, Poland; marta.gmurek@p.lodz.pl

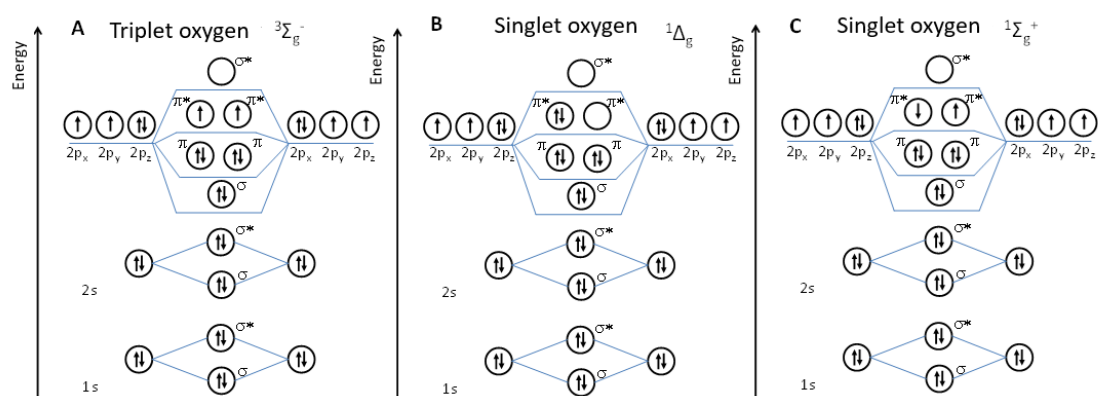

**Figure S1.** Distribution of electrons in the molecular orbitals of oxygen in the ground and singlet states. Arrows symbolize electrons, electron spins are marked with arrows.

**Table S1.** Lifetime of  $^1\Delta_g\text{O}_2$  in different solvents [8,15,21,29].

| solvent                                       | $\tau_\Delta, \mu\text{s}$ | $k_a \times 10^{-4}, 1/\text{s}$ | solvent                         | $\tau_\Delta, \mu\text{s}$ | $k_a \times 10^{-4}, 1/\text{s}$ |
|-----------------------------------------------|----------------------------|----------------------------------|---------------------------------|----------------------------|----------------------------------|
| H <sub>2</sub> O                              | 3.3                        | 50±20                            | C <sub>2</sub> H <sub>5</sub> N | 75                         | 3.3±0.7                          |
| D <sub>2</sub> O                              | 67                         | 3.0±0.2                          | CH <sub>2</sub> Cl <sub>2</sub> | 94                         | 1.6±0.7                          |
| C <sub>6</sub> H <sub>5</sub> CH <sub>3</sub> | 30                         | 4.0                              | CHCl <sub>3</sub>               | 247                        | 0.44±0.18                        |
| CH <sub>3</sub> OH                            | 10.4                       | 14±2                             | CS <sub>2</sub>                 | 34 000                     | 0.5±0.15                         |
| C <sub>6</sub> H <sub>6</sub>                 | 31                         | 4.2±0.9                          | C <sub>6</sub> D <sub>6</sub>   | 700                        | 0.27±0.06                        |
| C <sub>2</sub> Cl <sub>3</sub> F <sub>3</sub> | 99 000                     | -                                | C <sub>6</sub> F <sub>6</sub>   | 3900                       | 0.17±0.6                         |

**Table S2.** Constant rates of singlet oxygen reactions with physical and chemical quenchers.

| Quencher              | Quenching type        | Rate constant M <sup>-1</sup> s <sup>-1</sup> | Reference |
|-----------------------|-----------------------|-----------------------------------------------|-----------|
| NaN <sub>3</sub>      | physical              | $k_q = 4.78 \times 10^8$ (D <sub>2</sub> O)   | [30]      |
|                       |                       | $k_q = 2 \times 10^9$ (H <sub>2</sub> O)      | [31]      |
|                       |                       | $k_q = 2.8 \times 10^9$ (CH <sub>3</sub> CN)  | [30]      |
|                       |                       | $k_q = 1.2 \times 10^7$ (H <sub>2</sub> O)    | [31]      |
| DABCO                 | physical              | $k_q = 2 \times 10^7$ (D <sub>2</sub> O)      | [32]      |
| imidazole             |                       | $k_q = 1.4 \times 10^{10}$                    | [28]      |
| β-carotene            |                       | $k_q = 3.1 \times 10^{10}$                    |           |
| likopen               |                       |                                               |           |
| Histidine             | Physical and chemical | $k_q = 5 \times 10^7$                         | [28]      |
| 1-methyl-cyclopentane | chemical              | $k_r = 2.1 \times 10^5$ (CH <sub>3</sub> OH)  | [29]      |
| 4-methyl-cyclohexane  |                       | $k_r = 3.1 \times 10^3$ (CH <sub>3</sub> OH)  |           |

|                      |                                               |      |
|----------------------|-----------------------------------------------|------|
| 3-methylstyrene      | $k_i = 5.0 \times 10^6$                       | [11] |
| 2-phenylfuran        | $k_i = 9 \times 10^6 \text{ (H}_2\text{O)}$   |      |
| 2-chlorophenol anion | $k_i = 1.9 \times 10^8 \text{ (H}_2\text{O)}$ |      |
